# Supplementary material for: A Rapid and Efficient Screening System for Neutralizing Antibodies and Its Application for SARS-CoV-2
Source: PubMed Central journal article supplement (PMC8019923; doi:10.3389/fimmu.2021.653189), 2021-03-22
Supplement: DataSheet_1.pdf [file DataSheet_1.pdf]

Supplementary Table 1. Primers List of BCR RT-PCR

| Primer Name    | V/D/J gene segments | Primer Sequence(5'>3')                     | Usage description                                        |
|----------------|---------------------|--------------------------------------------|----------------------------------------------------------|
| GV 01          | IGHV1-18*01         | CGGTACCGCGGGCCCGGGAatggactggacctggagcat    | AP_G_Leader_Mix                                          |
| GV 02          | IGHV1-2*01          | CGGTACCGCGGGCCCGGGAatggactggacctggagcat    | As forward primer of heavy chain 1st PCR                 |
| GV 03          | IGHV1-24*01         | CGGTACCGCGGGCCCGGGAatggactggacctggagcat    |                                                          |
| GV 04          | IGHV1-38-4*01       | CGGTACCGCGGGCCCGGGAatggactggacctggagcat    |                                                          |
| GV 05          | IGHV1-45*01         | CGGTACCGCGGGCCCGGGAatggactggacctggagcat    |                                                          |
| GV 06          | IGHV1-46*01         | CGGTACCGCGGGCCCGGGAatggactggacctggagcat    |                                                          |
| GV 07          | IGHV1-58*01         | CGGTACCGCGGGCCCGGGAatggactggacctggagcat    |                                                          |
| GV 08          | IGHV1-69*01         | CGGTACCGCGGGCCCGGGAatggactggacctggagcat    |                                                          |
| GV 09          | IGHV2-26*01         | CGGTACCGCGGGCCCGGGAatggacacactttgtctcac    |                                                          |
| GV 10          | IGHV2-5*01          | CGGTACCGCGGGCCCGGGAatggacacactttgtctcac    |                                                          |
| GV 11          | IGHV2-70*01         | CGGTACCGCGGGCCCGGGAatggacacactttgtctcac    |                                                          |
| GV 12          | IGHV2/OR16-5*01     | CGGTACCGCGGGCCCGGGAatggacacactttgtctcac    |                                                          |
| GV 13          | IGHV3-11*01         | CGGTACCGCGGGCCCGGGAatggagtgtgggctgagctg    |                                                          |
| GV 14          | IGHV3-13*01         | CGGTACCGCGGGCCCGGGAatggagtgtgggctgagctg    |                                                          |
| GV 15          | IGHV3-16*01         | CGGTACCGCGGGCCCGGGAatggagtgtgggctgagctg    |                                                          |
| GV 16          | IGHV3-21*01         | CGGTACCGCGGGCCCGGGAatggagtgtgggctgagctg    |                                                          |
| GV 17          | IGHV3-43*01         | CGGTACCGCGGGCCCGGGAatggagtgtgggctgagctg    |                                                          |
| GV 18          | IGHV3-48*01         | CGGTACCGCGGGCCCGGGAatggagtgtgggctgagctg    |                                                          |
| GV 19          | IGHV3-49*01         | CGGTACCGCGGGCCCGGGAatggagtgtgggctgagctg    |                                                          |
| GV 20          | IGHV3-53*01         | CGGTACCGCGGGCCCGGGAatggagtgtgggctgagctg    |                                                          |
| GV 21          | IGHV3-64*01         | CGGTACCGCGGGCCCGGGAatggagtgtgggctgagctg    |                                                          |
| GV 22          | IGHV3-64D*06        | CGGTACCGCGGGCCCGGGAatggagtgtgggctgagctg    |                                                          |
| GV 23          | IGHV3-7*01          | CGGTACCGCGGGCCCGGGAatggagtgtgggctgagctg    |                                                          |
| GV 24          | IGHV3-9*01          | CGGTACCGCGGGCCCGGGAatggagtgtgggctgagctg    |                                                          |
| GV 25          | IGHV4-28*01         | CGGTACCGCGGGCCCGGGAatgaaacacctgtggttctt    |                                                          |
| GV 26          | IGHV4-38-2*02       | CGGTACCGCGGGCCCGGGAatgaaacacctgtggttctt    |                                                          |
| GV 27          | IGHV4-39*01         | CGGTACCGCGGGCCCGGGAatgaaacacctgtggttctt    |                                                          |
| GV 28          | IGHV4-59*01         | CGGTACCGCGGGCCCGGGAatgaaacacctgtggttctt    |                                                          |
| GV 29          | IGHV5-10-1*02       | CGGTACCGCGGGCCCGGGAatgaaacacctgtggttctt    |                                                          |
| GV 30          | IGHV5-51*01         | CGGTACCGCGGGCCCGGGAatgaaacacctgtggttctt    |                                                          |
| GV 31          | IGHV6-1*01          | CGGTACCGCGGGCCCGGGAatgaaacacctgtggttctt    |                                                          |
| KV 01          | IGKV1/OR2-4*01      | CGGTACCGCGGGCCCGGGAatgagggtccccactcaagct   | AP_K_Leader_Mix                                          |
| KV 02          | IGKV1/OR2-108*01    | CGGTACCGCGGGCCCGGGAatgagggtccccactcaagct   | As forward primer of kappa light chain 1st PCR           |
| KV 03          | IGKV1-16*01         | CGGTACCGCGGGCCCGGGAatgagggtccccactcaagct   |                                                          |
| KV 04          | IGKV1-27*01         | CGGTACCGCGGGCCCGGGAatgagggtccccactcaagct   |                                                          |
| KV 05          | IGKV1-5*01          | CGGTACCGCGGGCCCGGGAatgagggtccccactcaagct   |                                                          |
| KV 06          | IGKV1-8*01          | CGGTACCGCGGGCCCGGGAatgagggtccccactcaagct   |                                                          |
| KV 07          | IGKV1D-16*01        | CGGTACCGCGGGCCCGGGAatgagggtccccactcaagct   |                                                          |
| KV 08          | IGKV1D-43*01        | CGGTACCGCGGGCCCGGGAatgagggtccccactcaagct   |                                                          |
| KV 09          | IGKV2-24*01         | CGGTACCGCGGGCCCGGGAatgagggtccccactcaagct   |                                                          |
| KV 10          | IGKV2-28*01         | CGGTACCGCGGGCCCGGGAatgagggtccccactcaagct   |                                                          |
| KV 11          | IGKV3/OR2-268*01    | CGGTACCGCGGGCCCGGGAatgagggtccccactcaagct   |                                                          |
| KV 12          | IGKV3-15*01         | CGGTACCGCGGGCCCGGGAatgagggtccccactcaagct   |                                                          |
| KV 13          | IGKV3-20*01         | CGGTACCGCGGGCCCGGGAatgagggtccccactcaagct   |                                                          |
| KV 14          | IGKV3-7*01          | CGGTACCGCGGGCCCGGGAatgagggtccccactcaagct   |                                                          |
| KV 15          | IGKV3D-7*01         | CGGTACCGCGGGCCCGGGAatgagggtccccactcaagct   |                                                          |
| KV 16          | IGKV4-1*01          | CGGTACCGCGGGCCCGGGAatgagggtccccactcaagct   |                                                          |
| KV 17          | IGKV5-2*01          | CGGTACCGCGGGCCCGGGAatgagggtccccactcaagct   |                                                          |
| KV 18          | IGKV6-21*01         | CGGTACCGCGGGCCCGGGAatgagggtccccactcaagct   |                                                          |
| KV 19          | IGKV6D-41*01        | CGGTACCGCGGGCCCGGGAatgagggtccccactcaagct   |                                                          |
| LV 01          | IGLV1-40*01         | CGGTACCGCGGGCCCGGGAatggcctggctctctctctct   | AP_L_Leader_Mix                                          |
| LV 02          | IGLV1-41*01         | CGGTACCGCGGGCCCGGGAatggcctggctctctctctct   | As forward primer of lambda light chain 1st PCR          |
| LV 03          | IGLV1-47*02         | CGGTACCGCGGGCCCGGGAatggcctggctctctctctct   |                                                          |
| LV 04          | IGLV10-54*02        | CGGTACCGCGGGCCCGGGAatggcctggctctctctctct   |                                                          |
| LV 05          | IGLV11-55*01        | CGGTACCGCGGGCCCGGGAatggcctggctctctctctct   |                                                          |
| LV 06          | IGLV2-8*02          | CGGTACCGCGGGCCCGGGAatggcctggctctctctctct   |                                                          |
| LV 07          | IGLV3-1*01          | CGGTACCGCGGGCCCGGGAatggcctggctctctctctct   |                                                          |
| LV 08          | IGLV3-10*02         | CGGTACCGCGGGCCCGGGAatggcctggctctctctctct   |                                                          |
| LV 09          | IGLV3-19*01         | CGGTACCGCGGGCCCGGGAatggcctggctctctctctct   |                                                          |
| LV 10          | IGLV3-21*01         | CGGTACCGCGGGCCCGGGAatggcctggctctctctctct   |                                                          |
| LV 11          | IGLV3-25*02         | CGGTACCGCGGGCCCGGGAatggcctggctctctctctct   |                                                          |
| LV 12          | IGLV3-27*01         | CGGTACCGCGGGCCCGGGAatggcctggctctctctctct   |                                                          |
| LV 13          | IGLV3-9*02          | CGGTACCGCGGGCCCGGGAatggcctggctctctctctct   |                                                          |
| LV 14          | IGLV4-3*01          | CGGTACCGCGGGCCCGGGAatggcctggctctctctctct   |                                                          |
| LV 15          | IGLV4-60*02         | CGGTACCGCGGGCCCGGGAatggcctggctctctctctct   |                                                          |
| LV 16          | IGLV5-39*02         | CGGTACCGCGGGCCCGGGAatggcctggctctctctctct   |                                                          |
| LV 17          | IGLV6-57*02         | CGGTACCGCGGGCCCGGGAatggcctggctctctctctct   |                                                          |
| LV 18          | IGLV7-43*01         | CGGTACCGCGGGCCCGGGAatggcctggctctctctctct   |                                                          |
| LV 19          | IGLV8-61*02         | CGGTACCGCGGGCCCGGGAatggcctggctctctctctct   |                                                          |
| LV 20          | IGLV8/OR8-1*02      | CGGTACCGCGGGCCCGGGAatggcctggctctctctctct   |                                                          |
| LV 21          | IGLV9-49*02         | CGGTACCGCGGGCCCGGGAatggcctggctctctctctct   |                                                          |
| IGHJ 01        | IGHJ1*01            | GATGGGCCCTTGGTGGAGGGTGAGGACAGGTGACACAGG    | IGHJ_region_Primer_Mix                                   |
| IGHJ 02        | IGHJ2*01            | GATGGGCCCTTGGTGGAGGGTGAGGACAGGTGACACAGG    |                                                          |
| IGHJ 03        | IGHJ3*01            | GATGGGCCCTTGGTGGAGGGTGAGGACAGGTGACACAGG    |                                                          |
| IGHJ 04        | IGHJ6*01            | GATGGGCCCTTGGTGGAGGGTGAGGACAGGTGACACAGG    |                                                          |
| IGKJ 01        | IGKJ1*01            | GATGGTGCAGCCACAGTTCGTTTATCCACCTTGCTGCC     | IGKJ_region_Primer_Mix                                   |
| IGKJ 02        | IGKJ2*01            | GATGGTGCAGCCACAGTTCGTTTATCCACCTTGCTGCC     |                                                          |
| IGKJ 03        | IGKJ3*01            | GATGGTGCAGCCACAGTTCGTTTATCCACCTTGCTGCC     |                                                          |
| IGKJ 04        | IGKJ4*01            | GATGGTGCAGCCACAGTTCGTTTATCCACCTTGCTGCC     |                                                          |
| IGKJ 05        | IGKJ5*01            | GATGGTGCAGCCACAGTTCGTTTATCCACCTTGCTGCC     |                                                          |
| IGLJ 01        | IGLJ1*01            | GGGGCAGCCTTGGGCTGACCTAGGACGGTGACCTTGCTCC   | IGLJ_region_Primer_Mix                                   |
| IGLJ 02        | IGLJ2*01            | GGGGCAGCCTTGGGCTGACCTAGGACGGTGACCTTGCTCC   |                                                          |
| IGLJ 03        | IGLJ4*01            | GGGGCAGCCTTGGGCTGACCTAATAATGATCAGCTGGGTTCC |                                                          |
| IGLJ 04        | IGLJ5*01            | GGGGCAGCCTTGGGCTGACCTAGGACGGTGACCTTGCTCC   |                                                          |
| IGLJ 05        | IGLJ5*02            | GGGGCAGCCTTGGGCTGACCTAGGACGGTGACCTTGCTCC   |                                                          |
| IGLJ 06        | IGLJ6*01            | GGGGCAGCCTTGGGCTGACCGAGGACGGTGACCTTGCTCC   |                                                          |
| IGLJ 07        | IGLJ7*01            | GGGGCAGCCTTGGGCTGACCGAGGACGGTGACCTTGCTCC   |                                                          |
| IGLJ 08        | IGLJ7*02            | GGGGCAGCCTTGGGCTGACCGAGGACGGTGACCTTGCTCC   |                                                          |
| G289-primer    | N.D.                | TCTTGTCCACCTTGGTGTGCT                      | As reverse primer of heavy chain RT & 1st PCR            |
| G97-primer     | N.D.                | AGTAGTCTTACCAGGACGCCAG                     | As reverse primer of heavy chain 2nd PCR                 |
| K244-primer    | N.D.                | GTTCCTCGTAGTCTGCTTCTCTCA                   | As reverse primer of kappa light chain RT & 1st PCR      |
| K194-primer-01 | N.D.                | GTGCTGTCTTGTCTCTCTCTCT                     | As reverse primer of kappa light chain 2nd PCR           |
| K194-primer-02 | N.D.                | GTGCTGTCTTGTCTCTCTCTCT                     |                                                          |
| L81-primer     | N.D.                | CACAGTGTGGCCTTGTGGCTTG                     | As reverse primer of lambda light chain RT & 1st PCR     |
| L19-primer-01  | N.D.                | GGGCGGGAACAGAGTGACC                        | As reverse primer of lambda light chain 2nd PCR          |
| L19-primer-02  | N.D.                | GGGCGGGAACAGAGTGACC                        |                                                          |
| L19-primer-03  | N.D.                | GGGCGGGAACAGAGTGACC                        |                                                          |
| AP3            | N.D.                | CGGTACCGCGGGCCCGGGA                        | As forward primer of 2nd PCR                             |
| G20FP          | N.D.                | CCCTCCACCAAGGGCCCATC                       | Construction of the linear antibody expression cassettes |
| K20FP          | N.D.                | CGAAGTGTGGCTGCACCATC                       |                                                          |
| L20FP          | N.D.                | GGTACGCCAAGGCTGCCCC                        |                                                          |
| CMV-FP-01      | N.D.                | AGATATACGGTGTGACATTG                       |                                                          |
| CMV-RP         | N.D.                | TCCCGGGCCCGCGGTACCG                        |                                                          |
| WPRE-RP        | N.D.                | AGCCCCAGCTGCACGATCT                        |                                                          |

Supplementary Table 2. The annotation of linear antibody expression cassettes

Linear expression cassettes For IGHC

|                            |                                                                                                                                                                      |
|----------------------------|----------------------------------------------------------------------------------------------------------------------------------------------------------------------|
| CMV-PP_Primer              | [AGATATACGCGTTGACATTG] [ATTATTGACTAGTATTAAATAGTAATCAATTACGGGGTCATTAGTTTCATAGCCCATATATGGAGTTCGCGGTTACATAAATACGGTAAATGGCCCGCCTGGCTGACGCCAACGACCCCGCCCATTTGACGTCAATAAT  |
| CMV promoter               | GACGTATGTTCCCATAGTAACGCCAATAGGGACTTTCCATTGACGTCAATGGGTGGAGTATTACGGTAAACTGCCACTTGGCAGTACATCAAGTGTATCATATGCCAAGTACGCCCCCTATTGACGTCAATGACGGTAAATGGCCCGCCTGGCATTATGCC    |
| CMV-RP_Primer              | AGTACATGACCTTATGGGACTTTCCCTACTTGGCAGTACATCTACGTATTAGTCTACGCTATTACCATGGTGATCGGGTTTGGCAGTACATCAATGGGCGTGGATAGCGGTTTGACTCACGGGATTTCCAAGTCTCCACCCCATTTGACGTCAATGGGAGTTTG |
| G20_Primer                 | TTTTGGCACAAAATCAACGGGACTTTCCAAAATGTCGTAACAACCTCCGCCCATTTGACGCAAAATGGGCGTAGGCGTGTACGTTGGAGGTCATATAAGCAGAGCTCGTTTAGTGAACCGTCAGATCGCTGGAGACGCCATCCACGCTGTTTTGACCTCCA    |
| hman IGHG1 Constant region | ]TAGAAGACACCGGGACCGATCCAGCCTCCGGACTCTAGACTTCGAATTTCTGCACTCGA [CGGTACCGCGGGCCCGGGA] [2nd-PCR_                                                                         |
| WPRES                      | product.] [CCCTCCACCAAGGCCCATC] [GGTCTCCCCCTGGCACCCCTCCCAAGAGCACCTCTGGGGCACAGCGGCCCTGGGTCGCTTGGTCAAGGACTACTTCCCGAACCGGTGACGGTGTGCTGGAACTCAGCGCCCTGACCAGCGCGTGCAC     |
| poly(A) signal             | ACCTTCCCGCTCTCTACAGTCTCTCAGACTCTACTCCCTCAGCAGCGTGTGACCGTGCCTCCAGCAGCTTGGGCACCCAGACTACATCTGCAACCTGAATCACAAGCCAGCAACCAAGTGGACAGAAAGTGTAGGCCAAAATCTTTGTGACAAAAC         |
| WPRES RP_Primer            | TCACACATGCCACCGTGCACGACCTGAACCTCTGGGGGACCGTCACTTCTCTCTCCCCCAAAACCAAGGACACCTCATGATCTCCCGGACCCCTGAGGTCAATGCTGGTGGTGGAGCTGAGCCACGAAAGACCTGAGGTCAAGTTCAACTGGT            |
|                            | ACGTGGACCGCGTGGAGGTGCATAATGCCAAGACAAAACCGCGGGAGGAGCAGTACAACAGCACGTACCCTGTGGTCAAGCTCCACCGCTCCAGCAGGACTGGCTGAATGGCAAGGAGTACAAGTGAAGGTCTCCAACAAGCCCTCCAGCCCATC          |
|                            | GAGAAAACCATCTCCAAGGCCAAGGGCAGCCCGGAGAACACAGGTGTACACCTGCCCCATCCCGGGATGAGCTGACCAAGAACAGGTGACCTGACCTGCCTGGTCAAAGGCTTCTATCCAGCGACATCCGCTGGAGTGGGAGAGCAATGGCAGCC          |
|                            | GGAGAACAACACAAAGCACCGCTCCGCTGCTGGACTCCGACGGCTCTTCTCTCTACAGCAAGCTCACCTGGACAAGAGCAGGTGGCAGCAGGGGAACGCTTCTCATGCTCCGTGATGATGAGGCTCTGCACAACCACTACACGCAGAAAGACCTCT         |
|                            | CCCTGTCTCCGGTAAATGA] GAATTCGCGGCCGAGTTGATATCT [CGACAATCAACCTCTGGATTACAAAATTTGTGAAAGATTGACTGGTATTCTTAACTATGTTGCTCCTTTTACGCTATGTTGGATACGCTGCTTTAATGCCTTTGTATCATGCTATT  |
|                            | GCTTCCCGTATGGCTTTCATTTTCTCTCTTGTATAAAATCTGGTTGCTGTCTTTATGAGGAGTTGTGGCCCGTTGTCCAGCAACCTGGCGTGTGACTGTTTGTGCTGACGCAACCCCACTGGTGGGGCATTTGCCACCCTGTGACCTCTTTTC            |
|                            | CGGGACTTTTCGCTTTCCCCCTCCCTATTGCGCAGCGGAACTCATFCGCGCCTGCTTGGCCGCTGCTGGACAGGGGCTCGGCTGTTGGGACTGACAAATTCGTTGGTGTGTTGCGGGAAAGTCAAGTCTTCCATGGCTGCTCGCCTGTGTTGCCACCTGGA    |
|                            | TTCCTGCGGGGACGCTTCTTGTGCTACGTCCTTCCGCCCTCAATCCAGCGGACCTTCTTCCCGCGGCTGCTGCCGGCTTCCGCGCTTCCGCGCTTCCGCTTCCGCTCAGACGAGTCGGATCTCCCTTTGGCGCCTCCCGCCTGG] [AAACGGGG          |
|                            | GAGGCTAACTGAAACACGGAAGGAGACAATACCGGAAGGAAACCGCGCTATGACGGCAATAAAAAGACAGAATAAAACGACAGCGGTGTTGGTCTGTTTTCATAAACCGGGGTTCCGTCACAGGGCTGGCACTCTGTCGATACCCACCGAGACCCCATTTGG   |
|                            | GGCCAAACGCGCCGCTTCTTCTTTTCCCAACCCACCCCAAGTTCCGGGTGAAGGCCAGGGCTCGCAGCAACGTCGGGGCGGACGGCCCTGCCATAGC] [AGATCTGCGCAGCTGGGGCT]                                            |

Linear expression cassettes For IGK(kappa)

|                            |                                                                                                                                                                             |
|----------------------------|-----------------------------------------------------------------------------------------------------------------------------------------------------------------------------|
| CMV-PP_Primer              | [AGATATACGCGTTGACATTG] [ATTATTGACTAGTATTAAATAGTAATCAATTACGGGGTCATTAGTTTCATAGCCCATATATGGAGTTCGCGGTTACATAAATACGGTAAATGGCCCGCCTGGCTGACGCCAACGACCCCGCCCATTTGACGTCAATAAT         |
| CMV promoter               | GACGTATGTTCCCATAGTAACGCCAATAGGGACTTTCCATTGACGTCAATGGGTGGAGTATTACGGTAAACTGCCACTTGGCAGTACATCAAGTGTATCATATGCCAAGTACGCCCCCTATTGACGTCAATGACGGTAAATGGCCCGCCTGGCATTATGCC           |
| CMV-RP_Primer              | AGTACATGACCTTATGGGACTTTCCCTACTTGGCAGTACATCTACGTATTAGTCTACGCTATTACCATGGTGATCGGGTTTGGCAGTACATCAATGGGCGTGGATAGCGGTTTGACTCACGGGATTTCCAAGTCTCCACCCCATTTGACGTCAATGGGAGTTTG        |
| K20_Primer                 | TTTTGGCACAAAATCAACGGGACTTTCCAAAATGTCGTAACAACCTCCGCCCATTTGACGCAAAATGGGCGTAGGCGTGTACGTTGGAGGTCATATAAGCAGAGCTCGTTTAGTGAACCGTCAGATCGCTGGAGACGCCATCCACGCTGTTTTGACCTCCA           |
| hman IGHG1 Constant region | ]TAGAAGACACCGGGACCGATCCAGCCTCCGGACTCTAGACTTCGAATTTCTGCACTCGA [CGGTACCGCGGGCCCGGGA] [2nd-PCR_                                                                                |
| WPRES                      | product.] [CGAAGTGTGGCTGCACATC] [TGTCTTATCTTCCCGCCCTGATGAGCAGTTGAAATCTGGAACCTGCCCTGTTGTGCTGCTGCTGAATAAATCTTATCCAGAGAGGCCAAAAGTACAGTGAAGGTGGATAACGCCCTCCAATCGGGTAAAC         |
| poly(A) signal             | TCCAGGAGAGTGTACAGAGCAGGACAGCAAGGACAGCACTACAGCCTCAGCAGCAGCCCTGACGCTGAGCAAAAGCAGACTACGAGAAAACAAAAGTCTACGCTTCCGAAAGTCAACCAAGAGGTTCAACAGGGGAGA                                  |
| WPRES RP_Primer            | GTGTTAG] GAATTCGCGGCCGCGAGTTGATATCT [CGACAATCAACCTCTGGATTACAAAATTTGTGAAAGATTGACTGGTATTCTTAACTATGTTGCTCCTTTTACGCTATGTTGGATACGCTGCTTTAATGCCTTTGTATCATGCTATTGCTTCCCGTATGG      |
|                            | CTTTCAATTTCTCTCTTGTATAAAATCTGGTTGCTGTCTTTATGAGGAGTTGTGGCCCGTTGTCCAGCAACCTGGCGTGTGACTGTTTGTGCTGACGCAACCCCACTGGTGGGGCATTTGCCACCCTGTGACCTCTTTCCGGGACTTTTCGCT                   |
|                            | TTCCCCCTCCCTATTGCCACGGCGGAACTCATFCGCGCCTGCTTCCCGCCTGCTGGACAGGGGCTCGGCTGTTGGGACTGACAAATCCGTTGTTGTGCGGGAAAGTCAAGTCTTCCATGGCTGCTCGCCTGTGTTGCCACCTGGAAATCTGCGCGGGAC             |
|                            | GTCTTCTGCTACGTCCTTCCGCCCTCAATCCAGCGGACCTTCTTCCCGCGGCTGCTGCCGGCTCTGCGGCTCTTCCGCTCTTCCGCTTCCGCTTCCGCTTCCGCTTCCGCTTCCGCTTCCGCTTCCGCTTCCGCTTCCGCTTCCGCTTCCGCTTCCGCTTCCGCTTCCGCT |
|                            | ACACGGAAGGAGACAATACCGGAAGGAAACCGCGCTATGACGGCAATAAAAAGACAGAATAAAACGACAGCGGTGTTGGTCTGTTTTCATAAACCGGGGTTCCGTCACAGGGCTGGCACTCTGTCGATACCCACCGAGACCCCATTTGGGGCCAAATAGCCCC         |
|                            | CGTCTTCTCTTTTCCCAACCCACCCCAAGTTCCGGGTGAAGGCCAGGGCTCGCAGCAACGTCGGGGCGGACGGCCCTGCCATAGC] [AGATCTGCGCAGCTGGGGCT]                                                               |

Linear expression cassettes For IGL(lambda)

|                            |                                                                                                                                                                               |
|----------------------------|-------------------------------------------------------------------------------------------------------------------------------------------------------------------------------|
| CMV-PP_Primer              | [AGATATACGCGTTGACATTG] [ATTATTGACTAGTATTAAATAGTAATCAATTACGGGGTCATTAGTTTCATAGCCCATATATGGAGTTCGCGGTTACATAAATACGGTAAATGGCCCGCCTGGCTGACGCCAACGACCCCGCCCATTTGACGTCAATAAT           |
| CMV promoter               | GACGTATGTTCCCATAGTAACGCCAATAGGGACTTTCCATTGACGTCAATGGGTGGAGTATTACGGTAAACTGCCACTTGGCAGTACATCAAGTGTATCATATGCCAAGTACGCCCCCTATTGACGTCAATGACGGTAAATGGCCCGCCTGGCATTATGCC             |
| CMV-RP_Primer              | AGTACATGACCTTATGGGACTTTCCCTACTTGGCAGTACATCTACGTATTAGTCTACGCTATTACCATGGTGATCGGGTTTGGCAGTACATCAATGGGCGTGGATAGCGGTTTGACTCACGGGATTTCCAAGTCTCCACCCCATTTGACGTCAATGGGAGTTTG          |
| L20_Primer                 | TTTTGGCACAAAATCAACGGGACTTTCCAAAATGTCGTAACAACCTCCGCCCATTTGACGCAAAATGGGCGTAGGCGTGTACGTTGGAGGTCATATAAGCAGAGCTCGTTTAGTGAACCGTCAGATCGCTGGAGACGCCATCCACGCTGTTTTGACCTCCA             |
| hman IGHG1 Constant region | ]TAGAAGACACCGGGACCGATCCAGCCTCCGGACTCTAGACTTCGAATTTCTGCACTCGA [CGGTACCGCGGGCCCGGGA] [2nd-PCR_                                                                                  |
| WPRES                      | product.] [GGTACGCCCAAGGCCATC] [CTCGGTCACTCTGTTCCCGCCCTGCTTCCCGCCTGCTGGACAGGGGCTCGGCTGTTGGGACTGACAAATTCGTTGGTGTGTTGCGGGAAAGTCAAGTCTTCCATGGCTGCTCGCCTGTGTTGCCACCTGGAATTC       |
| poly(A) signal             | ATAG] GAATTCGCGGCCGCGAGTTGATATCT [CGACAATCAACCTCTGGATTACAAAATTTGTGAAAGATTGACTGGTATTCTTAACTATGTTGCTCCTTTTACGCTATGTTGGATACGCTGCTTTAATGCCTTTGTATCATGCTATTGCTTCCCGTATGGCTT        |
| WPRES RP_Primer            | TCATTTTCTCCTCTTGTATAAAATCTGGTTGCTGTCTTTATGAGGAGTTGTGGCCCGTTGTCCAGCAACCTGGCGTGTGACTGTTTGTGCTGACGCAACCCCACTGGTGGGGCATTTGCCACCCTGTGACCTCTTTCCGGGACTTTTCGCTTTC                    |
|                            | CCCTTCCCTATTGCCACGGCGGAACTCATFCGCGCCTGCTTGGCCGCTGCTGGACAGGGGCTCGGCTGTTGGGACTGACAAATTCGTTGGTGTGTTGCGGGAAAGTCAAGTCTTCCATGGCTGCTCGCCTGTGTTGCCACCTGGAAATTCGCGCGGGACGTC            |
|                            | CTTCTGCTACGTCCTTCCGCCCTCAATCCAGCGGACCTTCTTCCCGCGGCTGCTGCCGGCTTCCGCGCTTCCGCGCTTCCGCTTCCGCTTCCGCTTCCGCTTCCGCTTCCGCTTCCGCTTCCGCTTCCGCTTCCGCTTCCGCTTCCGCTTCCGCTTCCGCTTCCGCTTCCGCT |
|                            | CGGAAGGAGACAATACCGGAAGGAAACCGCGCTATGACGGCAATAAAAAGACAGAATAAAACGACAGCGGTGTTGGTCTGTTTTCATAAACCGGGGTTCCGTCACAGGGCTGGCACTCTGTCGATACCCACCGAGACCCCATTTGGGGCCAAATAGCCCCGCG           |
|                            | TTCCTTCTTTTCCCAACCCACCCCAAGTTCCGGGTGAAGGCCAGGGCTCGCAGCAACGTCGGGGCGGACGGCCCTGCCATAGC] [AGATCTGCGCAGCTGGGGCT]                                                                   |

Supplementary Table 3. Patient information

| Subject | Age (years) | Sex | Subject type                     | Clinical classification (mild:0, severe:1) | City where infected | Date of admission | Date of discharge | Date of blood sample collection | Volume of collected blood sample |
|---------|-------------|-----|----------------------------------|--------------------------------------------|---------------------|-------------------|-------------------|---------------------------------|----------------------------------|
| P#1     | 46          | F   | SARS-CoV-2 convalescence patient | 0                                          | Chongqing           | 2/3/2020          | 2/28/2020         | 3/16/2020                       | 30ml                             |
| P#2     | 50          | M   | SARS-CoV-2 convalescence patient | 0                                          | Chongqing           | 2/2/2020          | 2/28/2020         | 3/16/2020                       | 30ml                             |
| P#3     | 54          | M   | SARS-CoV-2 convalescence patient | 1                                          | Chongqing           | 1/29/2020         | 2/18/2020         | 3/16/2020                       | 30ml                             |
| P#4     | 47          | M   | SARS-CoV-2 convalescence patient | 1                                          | Chongqing           | 1/27/2020         | 2/23/2020         | 3/16/2020                       | 30ml                             |
| P#5     | 48          | F   | SARS-CoV-2 convalescence patient | 0                                          | Chongqing           | 2/16/2020         | 2/28/2020         | 3/16/2020                       | 30ml                             |
| P#6     | 31          | M   | SARS-CoV-2 convalescence patient | 0                                          | Chongqing           | 1/30/2020         | 2/10/2020         | 3/16/2020                       | 30ml                             |
| P#7     | 45          | F   | SARS-CoV-2 convalescence patient | 0                                          | Chongqing           | 2/1/2020          | 2/15/2020         | 3/16/2020                       | 30ml                             |
| P#8     | 51          | F   | SARS-CoV-2 convalescence patient | 0                                          | Chongqing           | 1/31/2020         | 2/17/2020         | 3/16/2020                       | 50ml                             |
| P#9     | 48          | M   | SARS-CoV-2 convalescence patient | 1                                          | Chongqing           | 1/30/2020         | 2/18/2020         | 4/1/2020                        | 50ml                             |
| P#10    | 31          | M   | SARS-CoV-2 convalescence patient | 0                                          | Chongqing           | 1/29/2020         | 2/18/2020         | 4/1/2020                        | 50ml                             |
| P#11    | 54          | M   | SARS-CoV-2 convalescence patient | 0                                          | Chongqing           | 2/2/2020          | 2/18/2020         | 4/1/2020                        | 30ml                             |
| P#12    | 47          | F   | SARS-CoV-2 convalescence patient | 0                                          | Chongqing           | 1/31/2020         | 2/10/2020         | 4/1/2020                        | 10ml                             |
| P#13    | 38          | M   | SARS-CoV-2 convalescence patient | 0                                          | Chongqing           | 2/10/2020         | 2/19/2020         | 4/1/2020                        | 10ml                             |
| P#14    | 33          | F   | SARS-CoV-2 convalescence patient | 0                                          | Chongqing           | 2/10/2020         | 3/9/2020          | 4/1/2020                        | 10ml                             |
| P#15    | 44          | M   | SARS-CoV-2 convalescence patient | 0                                          | Chongqing           | 2/5/2020          | 2/14/2020         | 4/1/2020                        | 50ml                             |
| P#16    | 60          | F   | SARS-CoV-2 convalescence patient | 0                                          | Chongqing           | 2/11/2020         | 3/5/2020          | 4/1/2020                        | 30ml                             |
| P#17    | 48          | M   | SARS-CoV-2 convalescence patient | 0                                          | Chongqing           | 2/12/2020         | 3/6/2020          | 4/1/2020                        | 30ml                             |
| P#18    | 53          | F   | SARS-CoV-2 convalescence patient | 0                                          | Chongqing           | 2/16/2020         | 2/28/2020         | 4/1/2020                        | 10ml                             |
| P#19    | 57          | M   | SARS-CoV-2 convalescence patient | 0                                          | Chongqing           | 1/29/2020         | 2/14/2020         | 4/1/2020                        | 10ml                             |
| P#20    | 44          | M   | SARS-CoV-2 convalescence patient | 0                                          | Chongqing           | 2/6/2020          | 2/29/2020         | 4/1/2020                        | 10ml                             |
| P#21    | 44          | F   | SARS-CoV-2 convalescence patient | 0                                          | Chongqing           | 2/13/2020         | 3/11/2020         | 4/1/2020                        | 30ml                             |
| P#22    | 20          | F   | SARS-CoV-2 convalescence patient | 0                                          | Chongqing           | 2/15/2020         | 2/25/2020         | 4/1/2020                        | 30ml                             |
| P#23    | 37          | M   | SARS-CoV-2 convalescence patient | 0                                          | Chongqing           | 2/2/2020          | 3/9/2020          | 4/1/2020                        | 50ml                             |
| P#24    | 44          | F   | SARS-CoV-2 convalescence patient | 0                                          | Chongqing           | 2/3/2020          | 2/28/2020         | 4/1/2020                        | 50ml                             |
| P#25    | 41          | M   | SARS-CoV-2 convalescence patient | 0                                          | Chongqing           | 1/31/2020         | 2/16/2020         | 4/1/2020                        | 14ml                             |
| P#26    | 66          | M   | SARS-CoV-2 convalescence patient | 0                                          | Chongqing           | 2/3/2020          | 2/16/2020         | 4/1/2020                        | 10ml                             |
| P#27    | 67          | F   | SARS-CoV-2 convalescence patient | 0                                          | Chongqing           | 2/4/2020          | 2/16/2020         | 4/1/2020                        | 10ml                             |
| P#28    | 50          | M   | SARS-CoV-2 convalescence patient | 1                                          | Chongqing           | 2/1/2020          | 2/29/2020         | 4/1/2020                        | 30ml                             |
| P#29    | 50          | F   | SARS-CoV-2 convalescence patient | 0                                          | Chongqing           | 1/28/2020         | 2/29/2020         | 4/1/2020                        | 50ml                             |
| P#30    | 49          | F   | SARS-CoV-2 convalescence patient | 0                                          | Chongqing           | 2/8/2020          | 3/6/2020          | 4/1/2020                        | 30ml                             |
| P#31    | 56          | M   | SARS-CoV-2 convalescence patient | 0                                          | Chongqing           | 2/1/2020          | 2/9/2020          | 4/1/2020                        | 30ml                             |
| P#32    | 55          | M   | SARS-CoV-2 convalescence patient | 0                                          | Chongqing           | 2/14/2020         | 2/21/2020         | 4/1/2020                        | 50ml                             |
| P#33    | 45          | F   | SARS-CoV-2 convalescence patient | 0                                          | Chongqing           | 2/1/2020          | 2/15/2020         | 4/1/2020                        | 30ml                             |
| P#34    | 47          | F   | SARS-CoV-2 convalescence patient | 0                                          | Chongqing           | 2/6/2020          | 2/17/2020         | 4/1/2020                        | 10ml                             |
| P#35    | 34          | M   | SARS-CoV-2 convalescence patient | 0                                          | Chongqing           | 1/28/2020         | 2/7/2020          | 4/1/2020                        | 10ml                             |
| P#36    | 47          | M   | SARS-CoV-2 convalescence patient | 1                                          | Chongqing           | 1/27/2020         | 2/23/2020         | 4/1/2020                        | 50ml                             |
| P#37    | 56          | M   | SARS-CoV-2 convalescence patient | 0                                          | Chongqing           | 1/30/2020         | 2/7/2020          | 4/1/2020                        | 40ml                             |
| P#38    | 63          | F   | SARS-CoV-2 convalescence patient | 0                                          | Chongqing           | 2/1/2020          | 2/25/2020         | 4/1/2020                        | 10ml                             |
| P#39    | 37          | M   | SARS-CoV-2 convalescence patient | 0                                          | Chongqing           | 1/27/2020         | 2/14/2020         | 4/1/2020                        | 10ml                             |

Supplementary Table 4. Three batches of S-RBD specific B memory cell sorting and efficiency evaluation

| Supplementary Table 4. Three batches of S-RBD specific B memory cell sorting and efficiency evaluation |              |         |                                      |                           |                                 |                                        |                                   |                                                 | Efficiency Evaluation                                     |                                              |                                                                 |
|--------------------------------------------------------------------------------------------------------|--------------|---------|--------------------------------------|---------------------------|---------------------------------|----------------------------------------|-----------------------------------|-------------------------------------------------|-----------------------------------------------------------|----------------------------------------------|-----------------------------------------------------------------|
| Batch                                                                                                  | Sample count | Subject | Volume of blood used for sorting(ml) | Total volume of blood(ml) | Number of sorted single B cells | Number of Paired mAbs after BCR RT-PCR | Number of Specific mAbs (note-01) | Number of Potential Neutralizing mAbs (note-01) | Percent of paired mAbs gene in sorted&cloned single cells | Percent of specific mAbs in paired mAbs gene | Percent of the potential neutralizing mAbs in the specific mAbs |
| 0428                                                                                                   | 1            | p#10    | 10                                   | 70                        | 192                             | 72                                     | 29                                | 12                                              | 38%                                                       | 40%                                          | 41%                                                             |
|                                                                                                        | 2            | p#11    | 10                                   |                           |                                 |                                        |                                   |                                                 |                                                           |                                              |                                                                 |
|                                                                                                        | 3            | p#29    | 10                                   |                           |                                 |                                        |                                   |                                                 |                                                           |                                              |                                                                 |
|                                                                                                        | 4            | p#30    | 10                                   |                           |                                 |                                        |                                   |                                                 |                                                           |                                              |                                                                 |
|                                                                                                        | 5            | p#32    | 10                                   |                           |                                 |                                        |                                   |                                                 |                                                           |                                              |                                                                 |
|                                                                                                        | 6            | p#36    | 10                                   |                           |                                 |                                        |                                   |                                                 |                                                           |                                              |                                                                 |
|                                                                                                        | 7            | p#37    | 10                                   |                           |                                 |                                        |                                   |                                                 |                                                           |                                              |                                                                 |
| 0505                                                                                                   | 1            | p#8     | 10                                   | 60                        | 1056                            | 324                                    | 127                               | 75                                              | 31%                                                       | 39%                                          | 59%                                                             |
|                                                                                                        | 2            | p#16    | 15                                   |                           |                                 |                                        |                                   |                                                 |                                                           |                                              |                                                                 |
|                                                                                                        | 3            | p#17    | 15                                   |                           |                                 |                                        |                                   |                                                 |                                                           |                                              |                                                                 |
|                                                                                                        | 4            | p#26    | 10                                   |                           |                                 |                                        |                                   |                                                 |                                                           |                                              |                                                                 |
|                                                                                                        | 5            | p#27    | 10                                   |                           |                                 |                                        |                                   |                                                 |                                                           |                                              |                                                                 |
| 0528                                                                                                   | 1            | p#01    | 10                                   | 75                        | 432                             | 101                                    | 42                                | 9                                               | 23%                                                       | 42%                                          | 21%                                                             |
|                                                                                                        | 2            | p#03    | 10                                   |                           |                                 |                                        |                                   |                                                 |                                                           |                                              |                                                                 |
|                                                                                                        | 3            | p#04    | 10                                   |                           |                                 |                                        |                                   |                                                 |                                                           |                                              |                                                                 |
|                                                                                                        | 4            | p#06    | 10                                   |                           |                                 |                                        |                                   |                                                 |                                                           |                                              |                                                                 |
|                                                                                                        | 5            | p#09    | 10                                   |                           |                                 |                                        |                                   |                                                 |                                                           |                                              |                                                                 |
|                                                                                                        | 6            | p#22    | 10                                   |                           |                                 |                                        |                                   |                                                 |                                                           |                                              |                                                                 |
|                                                                                                        | 7            | p#25    | 5                                    |                           |                                 |                                        |                                   |                                                 |                                                           |                                              |                                                                 |
|                                                                                                        | 8            | p#28    | 5                                    |                           |                                 |                                        |                                   |                                                 |                                                           |                                              |                                                                 |
|                                                                                                        | 9            | p#31    | 5                                    |                           |                                 |                                        |                                   |                                                 |                                                           |                                              |                                                                 |
|                                                                                                        |              |         |                                      | sum=205                   | sum=1680                        | sum=497                                | sum=198                           | sum=96                                          | mean=31%                                                  | mean=40%                                     | mean=41%                                                        |

Note-01: the linear expression cassettes were transfected into 293T cells for expressing Ab proteins. The supernatants of cell cultures were collected 48hs later. the specific binding ability were assessed by ELISA. the neutralization capability were assessed by pseudovirus assay, and the mAbs, of which neutralizing effect were over 75%, were termed as Neutralizing mAbs.

Supplementary Table 5. Gene family analysis of monoclonal antibodies

| Number | Ab_ID | Heavy chain       |                   |                   |                         | Light chain       |                   |               |  |
|--------|-------|-------------------|-------------------|-------------------|-------------------------|-------------------|-------------------|---------------|--|
|        |       | V-GENE and allele | D-GENE and allele | J-GENE and allele | CDR3-IMGT(aa)           | V-GENE and allele | J-GENE and allele | CDR3-IMGT(aa) |  |
| 1      | 81E8  | IGHV2-70*15 F     | IGHD6-13*01 F     | IGHJ4*02 F        | ARVQVAAGSPYDY           | IGKV1-39*01 F     | IGKJ1*01 F        | QQYTSPTPT     |  |
| 2      | 81D2  | IGHV3-53*01 F     | IGHD3-3*01 F      | IGHJ4*02 F        | ARFRYGDYDPDY            | IGKV1-33*01 F     | IGKJ3*01 F        | QQYDNLPSFT    |  |
| 3      | 81A2  | IGHV4-34*01 F     | IGHD2-2*02 F      | IGHJ6*02 F        | GVVPCSSSSCYRYGMDV       | IGKV1-9*01 F      | IGKJ5*01 F        | QQLNSYPOAT    |  |
| 4      | 81C8  | IGHV3-33*01 F     | IGHD3-3*01 F      | IGHJ4*02 F        | ARDGVDFGMVTLFDY         | IGKV1-39*01 F     | IGKJ1*01 F        | QQSYNTPPWT    |  |
| 5      | 81A1  | IGHV4-59*01 F     | IGHD6-19*01 F     | IGHJ3*02 F        | ARDQGYSSGWNDAFDI        | IGLV2-23*01 F     | IGLJ3*02 F        | CSYAGSRFWV    |  |
| 6      | 81A11 | IGHV1-69*02 F     | IGHD1-7*01 F      | IGHJ2*01 F        | AREAGATDWWYDFDL         | IGLV1-40*01 F     | IGLJ2*01 F        | QSYDSSLSVVV   |  |
| 7      | 81C3  | IGHV4-39*01 F     | IGHD3-3*01 F      | IGHJ4*02 F        | ARHPRFWSRGNDSGYFDY      | IGLV2-14*01 F     | IGLJ1*01 F        | SSFTSSSTPYV   |  |
| 8      | 81C7  | IGHV2-5*02 F      | IGHD3-10*01 F     | IGHJ4*02 F        | AHSMVRGVLFAGDFDY        | IGLV1-36*01 F     | IGLJ3*02 F        | AAWDDSLNPGV   |  |
| 9      | 81D5  | IGHV5-51*01 F     | IGHD1-26*01 F     | IGHJ3*02 F        | ARRWDGVGFDI             | IGLV3-19*01 F     | IGLJ1*01 F        | NSRSDSSINHYV  |  |
| 10     | 81F2  | IGHV4-34*01 F     | IGHD1-14*01 ORF   | IGHJ5*02 F        | ARGWTVPLWVWLNWDFP       | IGKV2-28*01 F     | IGKJ4*01 F        | MQALQTPRT     |  |
| 11     | 81G8  | IGHV3-7*05 F      | IGHD4-23*01 ORF   | IGHJ4*02 F        | ARSPHYVGGFDY            | IGLV6-57*02 F     | IGLJ3*02 F        | QSYHNSVWV     |  |
| 12     | 81E1  | IGHV1-24*01 F     | IGHD3-10*01 F     | IGHJ4*02 F        | AITSVARGLRGYFDI         | IGLV1-47*01 F     | IGLJ2*01 F        | AAWDDSLSRVV   |  |
| 13     | 81E10 | IGHV1-24*01 F     | IGHD3-10*01 F     | IGHJ4*02 F        | AITSLARGLKGYFDS         | IGLV1-47*01 F     | IGLJ2*01 F        | AAWDDSLSGVI   |  |
| 14     | 81A6  | IGHV3-9*01 F      | IGHD2-2*01 F      | IGHJ6*02 F        | AKDIGCSTSCSYHYHYGMDV    | IGKV2-28*01 F     | IGKJ2*01 F        | MQALQTPRT     |  |
| 15     | 81B2  | IGHV3-66*02 F     | IGHD6-19*01 F     | IGHJ4*02 F        | ARDGRAVAGTD             | IGKV1-33*01 F     | IGKJ1*01 F        | HQYDNLPRT     |  |
| 16     | 81B7  | IGHV1-18*04 F     | IGHD3-10*01 F     | IGHJ4*02 F        | ARDYVWFGELSTEGQFDY      | IGKV3-11*01 F     | IGKJ3*01 F        | QQRRDFT       |  |
| 17     | 82A6  | IGHV4-39*01 F     | IGHD6-19*01 F     | IGHJ4*02 F        | ARFITDGYSSGSDS          | IGKV1-39*01 F     | IGKJ4*01 F        | QQSYSTPRLT    |  |
| 18     | 82C4  | IGHV1-58*01 F     | IGHD1-26*01 F     | IGHJ6*02 F        | AADRMVRVGGKYYGMDV       | IGKV1-5*03 F      | IGKJ2*01 F        | QQYNSYSPGDT   |  |
| 19     | 82G8  | IGHV4-59*08 F     | IGHD2-15*01 F     | IGHJ5*02 F        | ARRSMGYCSGNCYSGFDP      | IGKV1-39*01 F     | IGKJ4*01 F        | QQSYSTPQT     |  |
| 20     | 82B6  | IGHV4-61*04 F     | IGHD3-16*01 F     | IGHJ5*02 F        | AMTYDYDITWGRVDPQFDP     | IGKV2-30*01 F     | IGKJ1*01 F        | CMQGHWHPPWT   |  |
| 21     | 82B7  | IGHV1-18*04 F     | IGHD3-10*01 F     | IGHJ4*02 F        | ARDYVWFGELSTEGQFDY      | IGKV3-20*01 F     | IGKJ1*01 F        | HQYASSTRP     |  |
| 22     | 82C6  | IGHV4-39*01 F     | IGHD6-19*01 F     | IGHJ4*02 F        | ARFITDGYSSGSDS          | IGKV2-30*02 [F]   | IGKJ2*01 F        | MQGHTWPMYTH   |  |
| 23     | 82F6  | IGHV3-30*03 F     | IGHD2-15*01 F     | IGHJ4*02 F        | AKQASPYCSGSGCYSGNFDY    | IGKV1-33*01 F     | IGKJ4*01 F        | QQGHDNPLT     |  |
| 24     | 82A5  | IGHV1-18*04 F     | IGHD3-9*01 F      | IGHJ4*02 F        | ARVQWLRLDY              | IGKV1-12*01 F     | IGKJ4*01 F        | QQAQGFPLT     |  |
| 25     | 82C12 | IGHV2-5*02 F      | IGHD3-3*01 F      | IGHJ4*02 F        | AHRPAGFWSAHFDY          | IGKV1-39*01 F     | IGKJ1*01 F        | QQSYSTPAWT    |  |
| 26     | 51D3  | IGHV3-66*01 F     | IGHD1-26*01 F     | IGHJ6*02 F        | AREGLLVGPTGRGLGMDV      | IGKV1-33*01 F     | IGKJ2*01 F        | QQYADLPYT     |  |
| 27     | 51D4  | IGHV2-70*15 F     | IGHD3-10*01 F     | IGHJ4*02 F        | ARMVVRGVMLDY            | IGKV1-39*01 F     | IGKJ2*03 (F)      | QQSYSPHPS     |  |
| 28     | 51A3  | IGHV1-18*04 F     | IGHD3-10*01 F     | IGHJ4*02 F        | ARDLAWFGELSESPYIE       | IGKV3-11*01 F     | IGKJ5*01 F        | QQRGNSTI      |  |
| 29     | 51D2  | IGHV2-5*01 F      | IGHD3-9*01 F      | IGHJ3*01 F        | AHRLAPDYDFLTGYNGDDAFDV  | IGKV1-39*01 F     | IGKJ4*01 F        | QQNSINTALS    |  |
| 30     | 51A1  | IGHV3-66*01 F     | IGHD5-12*01 F     | IGHJ3*02 F        | ARDLNIAGGFDI            | IGKV1-9*01 F      | IGKJ5*01 F        | HLNIDPIT      |  |
| 31     | 51E12 | IGHV3-7*01 F      | IGHD2-2*01 F      | IGHJ4*02 F        | ARLMYYGNFDY             | IGKV1-8*01 F      | IGKJ2*01 F        | QQYYGYPT      |  |
| 32     | 51D12 | IGHV5-10-1*03 F   | IGHD2-2*01 F      | IGHJ6*02 F        | ARLPFCDSASCGRAYHYGMDV   | IGKV3-15*01 F     | IGKJ2*01 F        | QQYNNWPET     |  |
| 33     | 51F11 | IGHV1-69*04 F     | IGHD5-18*01 F     | IGHJ4*02 F        | ATGRYTYGYGYFDY          | IGKV3-20*01 F     | IGKJ2*02 (F)      | QQYSSRT       |  |
| 34     | 51E10 | IGHV1-18*04 F     | IGHD6-13*01 F     | IGHJ2*01 F        | ARARQLVNLWYFDL          | IGKV4-1*01 F      | IGKJ4*01 F        | QQYITPOLT     |  |
| 35     | 51E7  | IGHV3-13*01 F     | IGHD3-10*01 F     | IGHJ2*01 F        | ARVGYGSGSYWYLYWYFDL     | IGKV1-39*01 F     | IGKJ1*01 F        | QQSYAPPWT     |  |
| 36     | 51D7  | IGHV5-51*01 F     | IGHD6-19*01 F     | IGHJ3*02 F        | ATRITGWINDAFDI          | IGKV1-39*01 F     | IGKJ2*02 (F)      | QQSYSTPCT     |  |
| 37     | 51F5  | IGHV2-70*13 F     | IGHD1-7*01 F      | IGHJ4*02 F        | ALGRAGTMDY              | IGKV1-39*01 F     | IGKJ2*01 F        | QQSYSPPT      |  |
| 38     | 51E3  | IGHV3-9*01 F      | IGHD6-19*01 F     | IGHJ6*02 F        | AKDMVAGPHYGMDV          | IGLV1-44*01 F     | IGLJ3*02 F        | AAWDDSLNGWV   |  |
| 39     | 51B1  | IGHV5-51*01 F     | IGHD3-10*01 F     | IGHJ6*02 F        | ARHPNSFYDSGGDYAMDV      | IGLV2-23*02 F     | IGLJ3*02 F        | CSYAGSSWV     |  |
| 40     | 52C1  | IGHV3-66*01 F     | IGHD3-10*01 F     | IGHJ4*02 F        | ARLADSGSGSLYDFDY        | IGLV1-40*01 F     | IGLJ3*02 F        | QSYDSSLSGSWV  |  |
| 41     | 52G1  | IGHV3-9*01 F      | IGHD6-19*01 F     | IGHJ4*02 F        | AKDLSSGWDLFYD           | IGLV3-21*04 F     | IGLJ2*01 F        | QYDTSGLDPLV   |  |
| 42     | 52C6  | IGHV1-69*01 F     | IGHD1-26*01 F     | IGHJ6*02 F        | ATDGGGGSYYYAHYYYGMDV    | IGLV8-61*01 F     | IGLJ2*01 F        | VLYMGSIGV     |  |
| 43     | 52E7  | IGHV5-51*01 F     | IGHD4-17*01 F     | IGHJ4*02 F        | VRSDGDYVIGHDY           | IGLV1-44*01 F     | IGLJ3*02 F        | ATWDDSLNGRV   |  |
| 44     | 52B6  | IGHV3-48*03 F     | IGHD4-17*01 F     | IGHJ4*02 F        | ARGRDDYDYGDRGGDFDY      | IGKV3-11*01 F     | IGKJ3*01 F        | QQRNSWPPIT    |  |
| 45     | 52F7  | IGHV3-9*01 F      | IGHD2-2*01 F      | IGHJ6*02 F        | AKDIGVMVPGVTPYGMDV      | IGKV2D-30*01 F    | IGKJ2*02 (F)      | MQGHTWPPGT    |  |
| 46     | 52B8  | IGHV1-69*01 F     | IGHD3-10*01 F     | IGHJ3*02 F        | ARGPAYVSGTYWNAFDI       | IGKV3-15*01 F     | IGKJ2*01 F        | QYDTHWPLYT    |  |
| 47     | 52E9  | IGHV3-30*04 F     | IGHD6-13*01 F     | IGHJ3*02 F        | ARDPPNGMGSMAQHLVLLVDFDI | IGKV1-39*01 F     | IGKJ4*01 F        | QQYTTLALT     |  |
| 48     | 52G9  | IGHV3-66*01 F     | IGHD6-25*01 F     | IGHJ6*02 F        | ARDPMRPGMDV             | IGKV1-33*01 F     | IGKJ1*01 F        | QQYDNLPRT     |  |
| 49     | 53H3  | IGHV3-66*01 F     | IGHD4-17*01 F     | IGHJ3*02 F        | ARYYQOGRAFDI            | IGKV1-33*01 F     | IGKJ3*01 F        | QQYDNLPLT     |  |
| 50     | 53C5  | IGHV1-69*09 F     | IGHD5-18*01 F     | IGHJ4*02 F        | ARGRYTYGTEGYFDN         | IGKV1-5*01 F      | IGKJ2*01 F        | QQYNNLYT      |  |
| 51     | 53G1  | IGHV3-33*03 F     | IGHD6-19*01 F     | IGHJ4*02 F        | AKGGFGYASGWYLYDY        | IGKV1-33*01 F     | IGKJ5*01 F        | QQYGNLPIA     |  |
| 52     | 53B2  | IGHV3-13*01 F     | IGHD3-22*01 F     | IGHJ4*02 F        | ARAYYDTSYGYNYFDH        | IGKV3-15*01 F     | IGKJ2*01 F        | QHYNNWPLYT    |  |
| 53     | 53H5  | IGHV3-53*01 F     | IGHD3-10*01 F     | IGHJ5*02 F        | ARGYVSGSYWGFDP          | IGKV3-15*01 F     | IGKJ2*01 F        | QHYNNWPLYT    |  |
| 54     | 53H6  | IGHV3-53*04 F     | IGHD1-26*01 F     | IGHJ6*02 F        | AREGLGMDV               | IGKV3-15*01 F     | IGKJ2*01 F        | QHYNNWPLYT    |  |
| 55     | 53F9  | IGHV3-53*04 F     | IGHD1-26*01 F     | IGHJ4*02 F        | AREGLVGTTLTFDY          | IGKV2D-30*01 F    | IGKJ2*02 (F)      | MQGHTWPPGT    |  |
| 56     | 53G6  | IGHV2-70*15 F     | IGHD1-26*01 F     | IGHJ5*02 F        | ARFLVGGFKAFWDFP         | IGLV1-51*01 F     | IGLJ3*02 F        | GTWDDSLNWWV   |  |
| 57     | 53C10 | IGHV3-43*02 F     | IGHD1-20*01 F     | IGHJ4*02 F        | ARLSPKITGYFDY           | IGLV3-21*02 F     | IGLJ1*01 F        | QYVDDSSDPYV   |  |
| 58     | 53E11 | IGHV1-46*01 F     | IGHD5-12*01 F     | IGHJ4*02 F        | ARDQAFIVATLGPDY         | IGLV8-61*01 F     | IGLJ3*02 F        | VLYMGSIGV     |  |
| 59     | 53E12 | IGHV3-53*01 F     | IGHD5-12*01 F     | IGHJ5*02 F        | AKMLWLRGWDFP            | IGLV6-57*03 F     | IGLJ3*02 F        | QSYDTSNHV     |  |
| 60     | 53F12 | IGHV3-66*01 F     | IGHD4-23*01 ORF   | IGHJ6*02 F        | ARDAVGSYYGMEV           | IGKV3-15*01 F     | IGKJ2*01 F        | QHYNNWPLYT    |  |
| 61     | 54H2  | IGHV5-51*01 F     | IGHD6-19*01 F     | IGHJ4*02 F        | ARQESGWSFDY             | IGKV1-39*01 F     | IGKJ1*01 F        | QQSYSTPRT     |  |
| 62     | 54F10 | IGHV3-53*04 F     | IGHD5-24*01 ORF   | IGHJ6*02 F        | ARDLEERGAMDV            | IGKV3-20*01 F     | IGKJ1*01 F        | QQYSSLWT      |  |
| 63     | 54G7  | IGHV3-66*01 F     | IGHD3-16*02 F     | IGHJ5*02 F        | ARAGLWRGRFDP            | IGLV3-21*02 F     | IGLJ3*02 F        | QYVDDSTDLPHWV |  |
| 64     | 55G3  | IGHV2-70*15 F     | IGHD1-14*01 ORF   | IGHJ3*02 F        | ATRGLGITAFDI            | IGKV1-39*01 F     | IGKJ1*01 F        | QQSYTTPRT     |  |
| 65     | 55A8  | IGHV1-69*04 F     | IGHD4-17*01 F     | IGHJ4*02 F        | ARGTEYGDYDVSHD          | IGKV1-5*03 F      | IGKJ2*01 F        | QQYNSYSHT     |  |
| 66     | 55C9  | IGHV3-53*04 F     | IGHD2-15*01 F     | IGHJ4*02 F        | AREGLVGTALAFDY          | IGKV1-39*01 F     | IGKJ2*01 F        | QQSYSTPPYT    |  |
| 67     | 55G9  | IGHV3-13*01 F     | IGHD3-22*01 F     | IGHJ2*01 F        | ARVGYDSSGYWYLYDL        | IGKV1-39*01 F     | IGKJ3*01 F        | QQSYTTPLT     |  |
| 68     | 55G11 | IGHV3-30*03 F     | IGHD2-15*01 F     | IGHJ4*02 F        | KGGAGPYCGGSCYPTKVDY     | IGKV1-33*01 F     | IGKJ1*01 F        | QQYDNLWT      |  |
| 69     | 56C3  | IGHV3-33*01 F     | IGHD3-10*01 F     | IGHJ4*02 F        | AKDGGSSYNSGALDY         | IGKV1-33*01 F     | IGKJ2*01 F        | QQYDNLPPYT    |  |
| 70     | 56H3  | IGHV3-66*01 F     | IGHD4-17*01 F     | IGHJ4*02 F        | ARDYGDYFDY              | IGKV3-20*01 F     | IGKJ1*01 F        | QQYSSPRT      |  |
| 71     | 56B4  | IGHV1-18*01 F     | IGHD2-2*01 F      | IGHJ4*02 F        | ATDDPDIPLVPAAMSLDY      | IGKV1-39*01 F     | IGKJ4*01 F        | QQNSINTALS    |  |
| 72     | 56D7  | IGHV3-66*01 F     | N.D.              | IGHJ6*02 F        | ARDLDYGMVDY             | IGKV1-9*01 F      | IGKJ5*01 F        | QQLNSYPPIT    |  |
| 73     | 56H7  | IGHV4-59*01 F     | IGHD3-22*01 F     | IGHJ6*02 F        | ATDYDSSGYRYGMDV         | IGKV1D-12*01 F    | IGKJ4*01 F        | QYDSSFLT      |  |
| 74     | 56A8  | IGHV1-69*01 F     | IGHD1-26*01 F     | IGHJ4*02 F        | ASFGLWDLRDY             | IGKV3-20*01 F     | IGKJ4*01 F        | QQYGTSTR      |  |
| 75     | 56E8  | IGHV3-23*01 F     | IGHD2-15*01 F     | IGHJ4*02 F        | AKDVGSRLYDVFYD          | IGKV1-39*01 F     | IGKJ2*03 (F)      | QQSYSTPPYS    |  |
| 76     | 56A10 | IGHV2-70*15 F     | IGHD4-23*01 ORF   | IGHJ4*02 F        | TRTATVVKDY              | IGKV1-39*01 F     | IGKJ1*01 F        | QQSYSTPRT     |  |
| 77     | 56B11 | IGHV2-70*15 F     | IGHD6-6*01 F      | IGHJ4*02 F        | ARMIPALDY               | IGKV1-39*01 F     | IGKJ2*01 F        | QQSYSTPRT     |  |
| 78     | 56B12 | IGHV2-70*15 F     | IGHD6-13*01 F     | IGHJ4*02 F        | AREEAAGTKLDY            | IGKV1-39*01 F     | IGKJ1*01 F        | QQSYSTPRT     |  |
| 79     | 56C12 | IGHV3-30*03 F     | IGHD2-15*01 F     | IGHJ5*02 F        | AKDPTSLYCSGSCYNNWDFP    | IGKV1-39*01 F     | IGKJ1*01 F        | QQYTSPTPT     |  |
| 80     | 56E1  | IGHV3-30*04 F     | IGHD3-16*01 F     | IGHJ3*02 F        | AGGGVLVTSDDPAFDI        | IGLV1-44*01 F     | IGLJ3*02 F        | AAWDDSLNGWV   |  |
| 81     | 56A3  | IGHV3-30*03 F     | IGHD2-15*01 F     | IGHJ4*02 F        | AKRGGTYCSGICVGGYFDY     | IGLV1-40*01 F     | IGLJ3*02 F        | QSYDSSLSDWGV  |  |
| 82     | 56F3  | IGHV1-46*01 F     | IGHD3-10*01 F     | IGHJ4*02 F        | ARDYSRITMIRGAGDY        | IGLV1-51*01 F     | IGLJ3*02 F        | GTWDDSLSAQV   |  |
| 83     | 56H9  | IGHV3-53*04 F     | IGHD6-13*01 F     | IGHJ5*02 F        | ARGVPSSSWA              | IGLV2-14*01 F     | IGLJ1*01 F        | SSFTSSSTPYV   |  |
| 84     | 56H11 | IGHV4-4*07 F      | IGHD5-12*01 F     | IGHJ4*02 F        | AGEQHIVTTHDY            | IGLV1-44*01 F     | IGLJ3*02 F        | ATWDDSLNGRV   |  |
| 85     | 57B2  | IGHV3-30*04 F     | IGHD3-16*01 F     | IGHJ3*02 F        | AGGGVLVTSDDPAFDI        | IGKV1-33*01 F     | IGKJ3*01 F        | QQSDNVPPVT    |  |
| 86     | 57C4  | IGHV3-15*01 F     | IGHD4-17*01 F     | IGHJ5*01 F        | STNDDYGDYSANY           | IGKV1-39*01 F     | IGKJ4*01 F        | QQSYSTPRT     |  |
| 87     | 57E7  | IGHV5-51*01 F     | IGHD3-22*01 F     | IGHJ4*02 F        | ARIEYVNDSSGYQF          | IGKV3-20*01 F     | IGKJ1*01 F        | QQYSSWT       |  |
| 88     | 57H7  | IGHV1-8*02 F      | IGHD3-10*01 F     | IGHJ5*02 F        | ARGLWFGDLTRTKYNWDFP     | IGKV1D-13*01 F    | IGKJ4*01 F        | QQFNFLT       |  |
| 89     | 57A8  | IGHV3-23*01 F     | IGHD1-26*01 F     | IGHJ4*02 F        | AKGQRGSPDFDY            | IGKV1-5*03 F      | IGKJ4*01 F        | QQNSYSPLT     |  |
| 90     | 57B8  | IGHV3-53*01 F     | IGHD2-21*02 F     | IGHJ4*02 F        | ARDLVTWGLDY             | IGKV1-9*01 F      | IGKJ5*01 F        | QLLNTDPT      |  |
| 91     | 57A9  | IGHV1-3*04 (F)    | IGHD1-26*01 F     | IGHJ4*02 F        | ARAGWELNY               | IGKV4-1*01 F      | IGKJ1*01 F        | QQYSFWA       |  |
| 92     | 57G9  | IGHV2-70*15 F     | IGHD6-6*01 F      | IGHJ4*02 F        | ARITPHLVYDY             | IGKV1-39*01 F     | IGKJ2*02 (F)      | QQSYSPRT      |  |
| 93     | 57A6  | IGHV5-51*01 F     | IGHD6-19*01 F     | IGHJ4*02 F        | ARQESGWSFDY             | IGLV3-19*01 F     | IGLJ3*02 F        | NSRSDSSGNHWV  |  |
| 94     | 57F7  | IGHV4-34*01 F     | IGHD6-6*01 F      | IGHJ6*02 F        | ARDSSSSGVGTGMDV         | IGLV1-44*01 F     | IGLJ3*02 F        | AAWDDSLNGWV   |  |
| 95     | 57F8  | IGHV2-5*02 F      | IGHD3-10*01 F     | IGHJ5*02 F        | AHTTWYVYSGGWDFP         | IGLV1-44*01 F     | IGLJ2*01 F        | AAWDDSLNGWV   |  |
| 96     | 57A11 | IGHV1-18*01 F     | IGHD3-10*01 F     | IGHJ5*02 F        | ARVQEFWLDY              | IGLV3-21*04 F     | IGLJ3*02 F        | QYVDDSSDHLPL  |  |
| 97     | 57E11 | IGHV1-8*02 F      | IGHD3-10*01 F     | IGHJ5*02 F        | ARGLWFGDLTRTKYNWDFP     | IGLV1-44*01 F     | IGLJ3*02 F        | AAWDDSLNGWV   |  |
| 98     | 58G1  | IGHV3-53*01 F     | IGHD4-17*01 F     | IGHJ6*02 F        | ARDLEERGLDY             | IGKV1D-12*01 F    | IGKJ4*01 F        | QNTSFT        |  |
| 99     | 58D2  | IGHV3-11*01 F     | IGHD3-10*01 F     | IGHJ2*01 F        | ASPLSHNYSGGSYVNYWYFEL   | IGKV3-11*01 F     | IGKJ2*02 (F)      | QLGT          |  |
| 100    | 58A4  | IGHV4-59*01 F     | IGHD3-9*01 F      | IGHJ5*02 F        | ARTLGAAYDILTFGRTPGGWFAP | IGKV3-20*01 F     | IGKJ1*01 F        | QQYGSSPWT     |  |
| 101    | 58B5  | IGHV3-23*01 F     | IGHD3-10*01 F     | IGHJ4*02 F        | AKEPSLRGILWFGELSG       | IGKV3-20*01 F     | IGKJ2*01 F        | QQYSSLPYT     |  |
| 102    | 58G6  | IGHV1-58*01 F     | IGHD2-2*01 F      | IGHJ3*02 F        | AAAPNCNSTTCHDGFDI       | IGKV3-20*01 F     | IGKJ1*01 F        | QQYDNSPWT     |  |
| 103    | 58G9  | IGHV3-13*04 F     | IGHD3-9*01 F      | IGHJ3*02 F        | ARGSLRGGILSGVAFDI       | IGKV1-39*01 F     | IGKJ1*01 F        | QQYSSPPYT     |  |
| 104    | 58E2  | IGHV4-39*07 F     | IGHD3-10*01 F     | IGHJ3*02 F        | ARYVPGTYDADFDI          | IGLV2-14*01 F     | IGLJ3*02 F        | SSYSSSTWV     |  |
| 105    | 58A3  | IGHV3-30*04 F     | IGHD3-10*01 F     | IGHJ4*02 F        | ARDWVHYGSGYPPDY         | IGLV2-18*02 F     | IGLJ3*02 F        | SSYSSSTWV     |  |

|     |        |                 |                 |            |                              |                |              |              |
|-----|--------|-----------------|-----------------|------------|------------------------------|----------------|--------------|--------------|
| 106 | 58H3   | IGHV5-51*01 F   | IGHD3-10*01 F   | IGHJ4*02 F | ARHPVLRGNIDY                 | IGLV1-40*01 F  | IGLJ3*02 F   | QSYDSSLRGSV  |
| 107 | 510H2  | IGHV3-66*01 F   | IGHD5-12*01 F   | IGHJ4*02 F | ARDKWEGTFDY                  | IGKV1-9*01 F   | IGKJ4*01 F   | QQLNSYPRMT   |
| 108 | 510A4  | IGHV2-70*15 F   | IGHD6-13*01 F   | IGHJ4*02 F | ARVQVAAAAGSPYDY              | IGKV2-28*01 F  | IGKJ1*01 F   | MQALQMG      |
| 109 | 510G4  | IGHV4-31*03 F   | IGHD4-23*01 ORF | IGHJ4*02 F | ARDYGGNSNYFHY                | IGKV1-33*01 F  | IGKJ4*01 F   | QQYDTPLT     |
| 110 | 510H4  | IGHV3-66*01 F   | IGHD5-18*01 F   | IGHJ6*02 F | AETGWDGMDV                   | IGKV3-11*01 F  | IGKJ1*01 F   | QQRSNWPPT    |
| 111 | 510A5  | IGHV3-9*01 F    | IGHD3-9*01 F    | IGHJ4*02 F | AKDRGYEILTPASFDY             | IGKV1-39*01 F  | IGKJ2*01 F   | QQSYSTPPYT   |
| 112 | 510F6  | IGHV2-5*02 F    | IGHD5-18*01 F   | IGHJ4*02 F | AHSLPSKYSYSYGSFDDY           | IGKV1-39*01 F  | IGKJ2*01 F   | QQSYSAPTY    |
| 113 | 510D7  | IGHV1-69*04 F   | IGHD5-18*01 F   | IGHJ4*02 F | ATGRYTYGYGYFDY               | IGKV3-20*01 F  | IGKJ2*02 (F) | QQYSSPRT     |
| 114 | 510E10 | IGHV3-23*01 F   | IGHD3-10*01 F   | IGHJ5*02 F | AKGELLWFGELENWFDP            | IGKV1-12*01 F  | IGKJ1*01 F   | QQADSFPT     |
| 115 | 510H10 | IGHV2-70*15 F   | IGHD6-13*01 F   | IGHJ4*02 F | ARIQRGIAADY                  | IGKV1-39*01 F  | IGKJ2*02 (F) | QQSYSTPRT    |
| 116 | 510B1  | IGHV5-51*01 F   | IGHD3-10*01 F   | IGHJ3*02 F | ARLPHFGSGSYGNAFDI            | IGLV1-47*01 F  | IGLJ3*02 F   | ATWDDSLTGPV  |
| 117 | 510G2  | IGHV7-4-1*02 F  | IGHD3-10*01 F   | IGHJ6*02 F | ASTVGRSGTYGYGNYYSMDV         | IGLV2-14*01 F  | IGLJ2*01 F   | AAWYDSSSTSVV |
| 118 | 510H7  | IGHV4-59*08 F   | IGHD6-13*01 F   | IGHJ5*02 F | ARHCWPQQVLSNWFDP             | IGKV1D-13*01 F | IGKJ4*01 F   | QQFNNFLT     |
| 119 | 510H6  | IGHV1-46*01 F   | IGHD3-3*01 F    | IGHJ6*02 F | ARTGFLIPSKGGGMDV             | IGLV2-14*01 F  | IGLJ2*01 F   | SSYTSSSLQI   |
| 120 | 510C4  | IGHV3-48*03 F   | IGHD1-26*01 F   | IGHJ4*02 F | ARDPGEWESLDLDY               | IGLV1-40*01 F  | IGLJ3*02 F   | QSYDSSLSGNWW |
| 121 | 511A1  | IGHV4-31*03 F   | IGHD6-13*01 F   | IGHJ6*02 F | AREKIRSIAAAAGTVYYYGMDV       | IGKV3-15*01 F  | IGKJ1*01 F   | QQYNNWPPWT   |
| 122 | 511B4  | IGHV4-59*08 F   | IGHD3-22*01 F   | IGHJ5*01 F | ASTYWDSSGGYGYVDDY            | IGKV1D-12*01 F | IGKJ4*01 F   | QQYDSSALV    |
| 123 | 511E7  | IGHV5-51*01 F   | IGHD3-10*01 F   | IGHJ4*02 F | ALAVGRGIPTSYFDY              | IGKV1-33*01 F  | IGKJ3*01 F   | QQYHNLPT     |
| 124 | 511G7  | IGHV3-33*01 F   | IGHD4-17*01 F   | IGHJ4*02 F | AKNGYSYGDYLRGFDY             | IGKV1-33*01 F  | IGKJ1*01 F   | QQYHNPVA     |
| 125 | 511E9  | IGHV1-18*01 F   | IGHD3-10*01 F   | IGHJ4*02 F | AREGAGLIAYDY                 | IGKV6-21*01 F  | IGKJ2*01 F   | HQSSSLPYT    |
| 126 | 511D1  | IGHV1-18*01 F   | IGHD2-15*01 F   | IGHJ6*02 F | AVLDYCSGSSSSGYNYGMDV         | IGKV3-20*01 F  | IGKJ2*01 F   | QQYGRSPYT    |
| 127 | 511H11 | IGHV3-13*04 F   | IGHD6-19*01 F   | IGHJ6*03 F | VRGDHSSGWTYYYMDV             | IGKV1-39*01 F  | IGKJ1*01 F   | QQSYSSPPWT   |
| 128 | 511D12 | IGHV3-66*01 F   | IGHD5-12*01 F   | IGHJ3*02 F | ARDLDIAGAFDI                 | IGKV1-9*01 F   | IGKJ5*01 F   | QLLNSFPIT    |
| 129 | 511A5  | IGHV4-31*06 F   | IGHD3-22*01 F   | IGHJ2*01 F | ARIYRGTMVVVFSDLHWYFDL        | IGLV3-21*04 F  | IGLJ1*01 F   | QVWSSADHYV   |
| 130 | 511E5  | IGHV1-2*02 F    | IGHD3-16*01 F   | IGHJ2*01 F | ARDSLFSRVDWYFDY              | IGLV1-40*01 F  | IGLJ2*01 F   | NSRDSNGTVP   |
| 131 | 511G5  | IGHV1-46*01 F   | IGHD6-6*01 F    | IGHJ4*02 F | ARDGALYSNSPTEFDY             | IGLV1-47*01 F  | IGKJ4*01 F   | TTWADSRGGWV  |
| 132 | 511B7  | IGHV1-46*01 F   | IGHD2-2*01 F    | IGHJ4*02 F | ARGGLVPAVMPALDY              | IGLV1-47*01 F  | IGLJ3*02 F   | AAWDDSLSGPV  |
| 133 | 511H7  | IGHV3-23*01 F   | IGHD3-22*01 F   | IGHJ6*02 F | ARGLPYYDYTSYGYKDSYYYGVDDV    | IGLV1-47*01 F  | IGLJ3*02 F   | AAWDDSLSGPV  |
| 134 | 511B11 | IGHV3-7*03 F    | IGHD3-10*01 F   | IGHJ4*02 F | AGLFWYGGYFDY                 | IGLV1-40*01 F  | IGLJ1*01 F   | QSYDRSLSVLYV |
| 135 | 59B11  | IGHV3-13*04 F   | IGHD3-3*01 F    | IGHJ6*03 F | ARGTQDRVELMVGSPYYYMDV        | IGKV1-39*01 F  | IGKJ2*01 F   | QQSYITIMYT   |
| 136 | 59D6   | IGHV3-34*01 F   | IGHD3-22*01 F   | IGHJ4*02 F | ARHRRDYITMIVRPTLWAFDY        | IGLV1-40*01 F  | IGLJ2*01 F   | QSYDSALV     |
| 137 | 59A1   | IGHV3-66*01 F   | IGHD1-26*01 F   | IGHJ4*02 F | ARELGPVGGTDQ                 | IGKV1-39*01 F  | IGKJ2*01 F   | QQSHSTPYT    |
| 138 | 59A2   | IGHV3-66*01 F   | IGHD2-15*01 F   | IGHJ4*02 F | ARDLPLHGDYFDY                | IGKV1-33*01 F  | IGKJ1*01 F   | QQSDNFWPT    |
| 139 | 59H6   | IGHV3-30*04 F   | IGHD2-15*01 F   | IGHJ4*02 F | ARETLGGYCNGSSCYDAGYFDY       | IGKV3-20*01 F  | IGKJ1*01 F   | QQYSSPWT     |
| 140 | 59G12  | IGHV3-33*01 F   | IGHD3-3*01 F    | IGHJ4*02 F | ARDGVDFGMVTFEDY              | IGKV1-39*01 F  | IGKJ1*01 F   | QQSYNPPWT    |
| 141 | 8B1E6  | IGHV4-4*02 F    | IGHD3-16*01 F   | IGHJ4*02 F | ARVOGLIDY                    | IGKV1-NL1*01 F | IGKJ2*02 (F) | QQYSTPPRT    |
| 142 | 8B1B1  | IGHV5-51*01 F   | IGHD6-13*01 F   | IGHJ6*03 F | ASQAAAAGYVYMDV               | IGKV1-39*01 F  | IGKJ1*01 F   | QQSYNLTWT    |
| 143 | 8B1H12 | IGHV3-23*01 F   | IGHD4-17*01 F   | IGHJ5*02 F | AKQTDYGVGWFDY                | IGKV1-33*01 F  | IGKJ4*01 F   | QQYDNFSLT    |
| 144 | 8B1E11 | IGHV1-69*06 F   | IGHD3-10*01 F   | IGHJ4*02 F | AVLPLHSSYNWYFDY              | IGKV3-11*01 F  | IGKJ2*01 F   | QQRSNWPPGMYT |
| 145 | 8B2F2  | IGHV2-5*02 F    | IGHD6-13*01 F   | IGHJ5*02 F | AHQRHSSNSWYVSAWFDY           | IGLV1-40*01 F  | IGLJ1*01 F   | QSYDSSLGNFV  |
| 146 | 8B5A6  | IGHV3-33*01 F   | IGHD6-13*01 F   | IGHJ4*02 F | AKGGWYSSKYYFDY               | IGKV2-28*01 F  | IGKJ1*01 F   | MQALQMG      |
| 147 | 8B2D5  | IGHV3-13*01 F   | IGHD4-17*01 F   | IGHJ3*02 F | ARGSDTVTTAFDI                | IGKV1-39*01 F  | IGKJ4*01 F   | QQSYTTPGLT   |
| 148 | 8B2H8  | IGHV3-53*04 F   | IGHD3-10*01 F   | IGHJ4*02 F | AREAPNSRSGSTNFYD             | IGKV1-39*01 F  | IGKJ2*01 F   | QQSYSTPPYT   |
| 149 | 8B2D11 | IGHV3-33*01 F   | IGHD5-18*01 F   | IGHJ4*02 F | AKNGYSYAYPRQYFDY             | IGKV1-33*01 F  | IGKJ2*02 (F) | QHYDNLKVT    |
| 150 | 8B2E4  | IGHV4-31*03 F   | IGHD3-10*01 F   | IGHJ4*02 F | ARVSRVYTMVRGIFDY             | IGLV2-23*02 F  | IGLJ2*01 F   | CLYAGHSTYVV  |
| 151 | 8B2G6  | IGHV4-38-2*02 F | IGHD2-21*02 F   | IGHJ4*02 F | ARVGVATILGVDDY               | IGLV6-57*03 F  | IGLJ3*02 F   | QSYDSSWV     |
| 152 | 8B2E12 | IGHV3-30*03 F   | IGHD6-19*01 F   | IGHJ6*02 F | AKGGGYISAWSTRYAMDV           | IGLV2-14*01 F  | IGLJ3*02 F   | SSYTSSTWV    |
| 153 | 8B3E9  | IGHV3-23*01 F   | IGHD6-13*01 F   | IGHJ4*02 F | AESSSLTGNFNY                 | IGLV3-21*03 F  | IGLJ3*02 F   | QVWDTAWV     |
| 154 | 8B5A1  | IGHV3-13*01 F   | IGHD5-18*01 F   | IGHJ4*02 F | ARGDFTTTGFYFDY               | IGKV1-NL1*01 F | IGKJ1*01 F   | QQDYNFPPWT   |
| 155 | 8B5B6  | IGHV1-69*04 F   | IGHD3-10*01 F   | IGHJ6*03 F | ARTEYSYDSGSSRAYSMV           | IGKV1-39*01 F  | IGKJ1*01 F   | QQTHSTPRT    |
| 156 | 8B5E5  | IGHV7-4-1*02 F  | IGHD6-13*01 F   | IGHJ5*02 F | ARVGPSSSWPS                  | IGKV1-39*01 F  | IGKJ1*01 F   | QQSYSTPRT    |
| 157 | 8B5C1  | IGHV3-33*01 F   | IGHD6-13*01 F   | IGHJ4*02 F | AKGGWYSSKYYFDY               | IGKV2-28*01 F  | IGKJ1*01 F   | MQALQMG      |
| 158 | 8B5F7  | IGHV3-7*01 F    | IGHD3-3*01 F    | IGHJ4*02 F | ARDLGLVWFGDPY                | IGKV1-NL1*01 F | IGKJ1*01 F   | QQYSSAPRT    |
| 159 | 8B4G4  | IGHV2-5*02 F    | IGHD3-9*01 F    | IGHJ4*02 F | AHSPDRHYFDVLTGYFNSERFYFDY    | IGLV1-51*01 F  | IGLJ2*01 F   | GTWDDSSLAGV  |
| 160 | 8B4A7  | IGHV4-39*07 F   | IGHD6-6*01 F    | IGHJ6*02 F | ARIPRHLQGDHYYYVMDV           | IGLV2-23*01 F  | IGLJ1*01 F   | CSYAGIFV     |
| 161 | 8B4D9  | IGHV3-30*03 F   | IGHD5-18*01 F   | IGHJ4*02 F | AKAAGGGYSYIYWGDDY            | IGLV6-57*03 F  | IGLJ3*02 F   | QSYDSSNLWV   |
| 162 | 8B4E1  | IGHV4-61*01 F   | IGHD2-2*01 F    | IGHJ6*02 F | AREYFVSLPAAQTLTYGGYD         | IGKV3-15*01 F  | IGKJ1*01 F   | QQYKNNWPPWT  |
| 163 | 8B4H2  | IGHV1-8*02 F    | IGHD3-10*01 F   | IGHJ5*02 F | ARGLWFGDLTRTKYNWFDP          | IGKV3-20*01 F  | IGKJ4*01 F   | HQYDSSPLT    |
| 164 | 8B4A3  | IGHV1-46*01 F   | IGHD3-10*01 F   | IGHJ6*02 F | ARDPSPSNGYDNIWETRSENHYNYGMDA | IGKV3-11*01 F  | IGKJ4*01 F   | QQRSNWPLYT   |
| 165 | 8B4C5  | IGHV3-11*06 F   | IGHD6-19*01 F   | IGHJ4*02 F | ARDGSAVAGPMSYFDY             | IGKV1-NL1*01 F | IGKJ1*01 F   | QQYSSIPRT    |
| 166 | 8B4E5  | IGHV2-70*15 F   | IGHD6-19*01 F   | IGHJ4*02 F | AREVAGAVHLDY                 | IGKV1-39*01 F  | IGKJ1*01 F   | QQSFSTPRT    |
| 167 | 8B4B6  | IGHV3-7*03 F    | N.D.            | IGHJ4*02 F | ARDLGLVWFGDLLF               | IGKV1-NL1*01 F | IGKJ1*01 F   | QQYYSDDPRT   |
| 168 | 8B4E11 | IGHV4-59*01 F   | IGHD3-10*01 F   | IGHJ4*02 F | ARGGYYFGPPRFDDY              | IGKV3-20*01 F  | IGKJ2*01 F   | QHYGSSPOYT   |
| 169 | 13G9   | IGHV1-58*01 F   | IGHD2-2*01 F    | IGHJ3*02 F | AAPYCSSTSCRDFDI              | IGKV3-20*01 F  | IGKJ1*01 F   | QQYGRSPWT    |

Supplementary Table 6. BCR RT-PCR Reaction mixture and PCR Program setup

**Section 01. Single Cell BCR RT-PCR Procedure****1. Preparation of PCR Reaction Mixture****(1) Preparation of RT****a. Preparation of RT\_Mix\_A (5µl/tube)**

| Seq. | Component         | Amount (µl) |
|------|-------------------|-------------|
| 1    | Water             | 2.6         |
| 2    | 2.5 mM dNTPs      | 2           |
| 3    | BCR RT Primer Mix | 0.4         |

**b. Preparation of RT\_Mix\_B (5µl/tube)**

| Seq. | Component                                     | Amount (µl) |
|------|-----------------------------------------------|-------------|
| 4    | Water                                         | 2.25        |
| 5    | 5×PrimeScript II Buffer                       | 2           |
| 6    | 200 U/µl PrimeScript II Reverse Transcriptase | 0.5         |
| 7    | 40,000 U/ml RNase Inhibitor, Murine (NEB)     | 0.25        |

**(2) Preparation of 1st and 2nd PCR (10µl/tube)**

1st PCR Mix N and 2nd PCR Mix N use the same reaction condition except the primers.

| Seq. | Component                            | Amount (µl) |
|------|--------------------------------------|-------------|
| 1    | 2×PrimeSTAR GC Buffer (Takara)       | 5           |
| 2    | nuclease-free water                  | 2.75        |
| 3    | 2.5 mM dNTP                          | 0.8         |
| 4    | 10 µM Forward Primer                 | 0.2         |
| 5    | 10 µM Reverse Primer                 | 0.2         |
| 6    | 2.5 U/µl PrimeSTAR HS DNA polymerase | 0.05        |
| 7    | Template                             | 0           |

**(3) Usage of primers****a. For 1st\_PCR\_Mix**

|                | For 1st PCR Mix Gamma | For 1st PCR Mix Kappa | For 1st PCR Mix Lambda |
|----------------|-----------------------|-----------------------|------------------------|
| Forward Primer | AP G leader Mix       | AP K leader Mix       | AP L leader Mix        |
| Reverse Primer | G289 primer(10µM)     | K244 Primer(10µM)     | L81 Primer(10µM)       |

**b. For 2nd\_PCR\_Mix**

|                | For 2nd PCR Mix Gamma  | For 2nd PCR Mix Kappa | For 2nd PCR Mix Lambda |
|----------------|------------------------|-----------------------|------------------------|
| Forward Primer | 10 µM AP Primer        | 10 µM AP Primer       | 10 µM AP Primer        |
| Reverse Primer | IGHJ region Primer Mix | 10 µM K194 Primer Mix | 10 µM L19 Primer Mix   |

**2. Operation Procedure**

- Take out the sorted 96-well plate at -80. Add 5µl RT\_Mix\_A to each well, and rinse the well to promote cell RNA dissolution.
- Incubate the plate at 65° for 5min and put it on ice immediately.
- Add 5µl of RT\_Mix\_B to each well of the plate, mix and centrifuge, and then perform RT reaction.
- 9µl aliquots of 1st\_PCR\_Mix in a new 96 wells plate, add 1µl RT product to each well, and then perform 1st PCR Reaction.
- After PCR is completed, the 1st product is ten-fold diluted, and 1µl is used as a template for the next round of PCR.
- 9µl aliquot 2nd\_PCR\_Mix in a new 96 wells plate, add 1µl 1st diluted product to each well, and then perform 2nd PCR Reaction.
- Prepare 2% agar gel, load 3µl sample to analysis PCR result.

**Section 02. PCR Program Setup****1. For RT Reaction**

|     |          |
|-----|----------|
| 45° | 45min    |
| 70° | 15min    |
| 4°  | infinity |

**2. For 1st PCR Reaction**

|     |          |          |
|-----|----------|----------|
| 95  | 3min     | 30cycles |
| 95  | 10s      |          |
| 55  | 5s       |          |
| 72° | 1min     |          |
| 72° | 5min     |          |
| 4°  | infinity |          |

**3. For 2nd PCR Reaction**

|     |          |          |
|-----|----------|----------|
| 95  | 3min     | 35cycles |
| 95  | 10s      |          |
| 55  | 5s       |          |
| 72° | 45s      |          |
| 72° | 5min     |          |
| 4°  | infinity |          |

Supplementary Table 7. Preparation of BCR Cloning primers

|                                                                                                                                                                                                                                                                                                                                                                                                                                                       |
|-------------------------------------------------------------------------------------------------------------------------------------------------------------------------------------------------------------------------------------------------------------------------------------------------------------------------------------------------------------------------------------------------------------------------------------------------------|
| <b>Step 01. Dissolve primer powder in water</b>                                                                                                                                                                                                                                                                                                                                                                                                       |
| the leader primers and J-region primers are dissolved to 100uM<br>the other primers are dissolved to 10uM                                                                                                                                                                                                                                                                                                                                             |
| <b>Step 02. Preparation of BCR RT Primer Mix (each 2uM)</b>                                                                                                                                                                                                                                                                                                                                                                                           |
| take 100ul G289_primer(10uM), K244_primer(10uM), L81 primer(10uM), respectively, then mix according to 1:1:1.                                                                                                                                                                                                                                                                                                                                         |
| <b>Step 03. Preparation of AP Leader Mix (each 2uM)</b>                                                                                                                                                                                                                                                                                                                                                                                               |
| (1) For AP_G_Leader_Mix: Add 380ul water to a 1.5ml centrifuge tube, and take 20ul each of the 31 GV_N primers, and the final volume is 1000ul;<br>(2) For AP_K_Leader_Mix: Add 620ul water to a 1.5ml centrifuge tube, and take 20ul each of the 19 KV_N primers, and the final volume is 1000ul;<br>(3) For AP_L_Leader_Mix: Add 580ul water to a 1.5ml centrifuge tube, and take 20ul each of the 21 LV_N primers, and the final volume is 1000ul; |
| <b>Step 04. Preparation of IGHJ region Primer Mix (each 2uM)</b>                                                                                                                                                                                                                                                                                                                                                                                      |
| Add 920ul water to a 1.5ml centrifuge tube, and take 20ul each of the 4 IGHJ_N primers, and the final volume is 1000ul;                                                                                                                                                                                                                                                                                                                               |
| <b>Step 05. Preparation of K194 Primer Mix</b>                                                                                                                                                                                                                                                                                                                                                                                                        |
| take 100ul each of the following 2 primers, then mix:<br>K194-primer-01 (10uM)<br>K194-primer-02 (10uM)                                                                                                                                                                                                                                                                                                                                               |
| <b>Step 06. Preparation of L19 Primer Mix</b>                                                                                                                                                                                                                                                                                                                                                                                                         |
| take 100ul each of the following 3 primers, then mix:<br>L19-primer-01 (10uM)<br>L19-primer-02 (10uM)<br>L19-primer-03 (10uM)                                                                                                                                                                                                                                                                                                                         |
